# Supplementary material for: Proteomic Analysis of Paracoccidioides brasiliensis During Infection of Alveolar Macrophages Primed or Not by Interferon-Gamma
Source: Front Microbiol. 2019 Feb 5;10:96. doi: 10.3389/fmicb.2019.00096 (PMC6371752; doi:10.3389/fmicb.2019.00096)
Supplement: Supplementary file 3 [file Table_1.xlsx]

## Sheet: Plan1
Supplementary Table 1- List of proteins identified in this study.
Accession	Description	Score		Fold change		Fold change Log(e)		Variance Log(e)		p-value
		Non-primed	Primed	Non-primed	Primed	Non-primed	Primed	Non-primed	Primed	Non-primed	Primed
PADG_12426	1,4-alpha-glucan-branching enzyme	908.18	745.04	1.87	1.36	0.9	0.31	0.19	0.19	0	1
PADG_04056	14-3-3 family protein epsilon	18174.25	11315.76	1.91	1.43	0.93	0.36	0.06	0.07	0	1
PADG_05085	1-pyrroline-5-carboxylate dehydrogenase	1535.16	3215.32	1.62	1.45	0.7	0.37	0.09	0.06	0	1
PADG_05109	2,3-bisphosphoglycerate-independent phosphoglycerate mutase	709.59	1255.36	1.64	1.72	0.71	0.54	0.13	0.11	0	1
PADG_00599	26S protease regulatory subunit 6A	602.27	436.54	+	#	+	#	+	#	+	#
PADG_05560	26S proteasome regulatory subunit rpn-1	ND	757.72	ND	#	ND	#	ND	#	ND	#
PADG_04718	2-methylcitrate dehydratase	13900.44	11210.66	1.54	1.55	0.62	0.44	0.05	0.08	0	1
PADG_04710	2-methylcitrate synthase, mitochondrial	4668.51	1868.25	1.96	0.65	0.97	-0.43	0.09	0.15	0	0
PADG_03114	3-deoxy-7-phosphoheptulonate synthase	ND	523.88	ND	#	ND	#	ND	#	ND	#
PADG_03466	3-hydroxyisobutyrate dehydrogenase	504.5	504.5	*	*	*	*	*	*	*	*
PADG_01407	40S ribosomal protein	1086.85	7497.56	0.83	0.63	-0.27	-0.47	0.11	0.12	1	0
PADG_07685	40S ribosomal protein	2464.92	2520.09	0.85	0.97	-0.24	-0.03	0.18	0.25	0.98	0.41
PADG_00784	40S ribosomal protein S0	2043.41	4550.38	1.16	1.43	0.21	0.36	0.15	0.11	0	1
PADG_06525	40S ribosomal protein S1	4251.54	4906.3	0.92	0.64	-0.12	-0.44	0.11	0.09	0.98	0
PADG_01267	40S ribosomal protein S11	7018.59	5706.97	0.49	0.41	-1.03	-0.88	0.24	0.18	1	0
PADG_01427	40S ribosomal protein S12	3942.19	1576.67	1.69	0.99	0.76	-0.01	0.2	0.18	0	0.5
PADG_00335	40S ribosomal protein S14	754.03	4602.27	0.94	0.66	-0.09	-0.41	0.25	0.18	0.77	0
PADG_02445	40S ribosomal protein S15	11116.97	6405.8	1.26	0.59	0.33	-0.53	0.2	0.24	0	0
PADG_00333	40S ribosomal protein S16	1172.37	1144.09	1.02	0.72	0.03	-0.33	0.17	0.16	0.4	0
PADG_00354	40S ribosomal protein S17	627.71	1524.81	0.76	0.51	-0.39	-0.67	0.11	0.16	1	0
PADG_06313	40S ribosomal protein S18	860.53	2306.16	0.76	0.57	-0.39	-0.56	0.13	0.15	1	0
PADG_12324	40S ribosomal protein S19	5223.43	4365.47	1.20	1.02	0.26	0.02	0.12	0.15	0	0.63
PADG_08602	40S ribosomal protein S2	6353.48	3621.3	0.77	0.47	-0.38	-0.76	0.12	0.11	1	0
PADG_06502	40S ribosomal protein S20	3654.92	3602.03	1.11	0.78	0.15	-0.25	0.17	0.2	0.07	0
PADG_07583	40S ribosomal protein S21	2863.1	3306.23	0.87	0.66	-0.2	-0.42	0.41	0.18	0.97	0
PADG_06680	40S ribosomal protein S22	6671.03	3503.9	2.30	0.61	1.2	-0.49	0.15	0.23	0	0
PADG_08238	40S ribosomal protein S26E	7080.2	2734.48	1.10	0.79	0.14	-0.24	0.16	0.17	0.07	0
PADG_08605	40S ribosomal protein S28	8370.77	5195.73	1.79	1.71	0.84	0.54	0.16	0.19	0	1
PADG_03315	40S ribosomal protein S4	588.64	3899.5	0.82	0.58	-0.28	-0.54	0.13	0.12	1	0
PADG_06838	40S ribosomal protein S5	2017.73	5075.18	0.85	0.54	-0.23	-0.62	0.11	0.13	1	0
PADG_01654	40S ribosomal protein S6-A	2998.6	2963.94	1.06	0.58	0.09	-0.54	0.12	0.19	0.1	0
PADG_00942	40S ribosomal protein S7	3626.77	4390.69	0.96	0.64	-0.06	-0.45	0.1	0.15	0.81	0
PADG_12365	40S ribosomal protein S8-A	1261.57	2524.96	0.87	0.54	-0.2	-0.62	0.11	0.11	1	0
PADG_03326	40S ribosomal protein S9	3573.49	4494.77	0.82	0.39	-0.29	-0.94	0.12	0.12	1	0
PADG_02214	4-aminobutyrate aminotransferase	1496.37	4656.87	0.68	0.45	-0.55	-0.8	0.14	0.17	1	0
PADG_08468	4-hydroxyphenylpyruvate dioxygenase	5311.48	5519.57	1.01	0.72	0.02	-0.33	0.07	0.13	0.28	0
PADG_06875	50S ribosomal protein L4	417.91	ND	*	ND	*	ND	*	ND	*	ND
PADG_08328	5-methyltetrahydropteroyltriglutamate-homocysteine S-methyltransferase	9967.91	4196.01	2.38	1.90	1.25	0.64	0.07	0.09	0	1
PADG_04030	60S acidic ribosomal protein P0	3277.31	1428.5	1.31	1.90	0.39	0.64	0.2	0.15	0	1
PADG_08244	60S acidic ribosomal protein P1	42791.86	14587.27	1.16	1.58	0.22	0.46	0.14	0.12	0	1
PADG_02446	60S acidic ribosomal protein P2	17861.02	14965.78	4.56	5.00	2.19	1.61	0.17	0.2	0	1
PADG_02828	60S ribosomal protein L10a	1172.05	1447.95	1.32	1.23	0.4	0.21	0.14	0.16	0	0.97
PADG_03778	60S ribosomal protein L10-A	4438.51	3782.16	1.09	0.56	0.12	-0.58	0.18	0.24	0.1	0
PADG_04106	60S ribosomal protein L11	2814.55	4743.63	0.88	0.50	-0.18	-0.69	0.22	0.22	0.93	0
PADG_07803	60S ribosomal protein L12	4295.99	4692.42	0.77	0.65	-0.38	-0.43	0.15	0.14	1	0
PADG_03856	60S ribosomal protein L15	883.04	2106.51	0.78	0.49	-0.35	-0.72	0.13	0.13	1	0
PADG_00514	60S ribosomal protein L16	4223.18	ND	*	ND	*	ND	*	ND	*	ND
PADG_06726	60S ribosomal protein L17	3177.31	1476.48	1.06	0.96	0.09	-0.04	0.13	0.27	0.11	0.41
PADG_05338	60S ribosomal protein L18-B	7862.46	4386.56	0.52	0.20	-0.93	-1.59	0.2	0.26	1	0
PADG_02249	60S ribosomal protein L2	5017.02	3459.35	1.26	1.01	0.33	0.01	0.12	0.16	0	0.53
PADG_03873	60S ribosomal protein L20	4851.73	2670.82	1.10	0.79	0.14	-0.24	0.16	0.24	0.04	0.05
PADG_04449	60S ribosomal protein L23	1563.11	ND	*	ND	*	ND	*	ND	*	ND
PADG_07924	60S ribosomal protein L24	433.47	ND	*	ND	*	ND	*	ND	*	ND
PADG_05883	60S ribosomal protein L25	4041.16	9936.49	1.02	0.88	0.03	-0.13	0.1	0.15	0.34	0.03
PADG_05939	60S ribosomal protein L27a	2405.32	1823.21	1.40	1.80	0.49	0.59	0.25	0.27	0	1
PADG_12253	60S ribosomal protein L3	1297.26	1750.4	0.96	0.63	-0.06	-0.46	0.12	0.12	0.85	0
PADG_03781	60S ribosomal protein L30	7576.74	2485.54	1.01	0.72	0.01	-0.33	0.27	0.2	0.5	0
PADG_01083	60S ribosomal protein L32	649.58	1109.4	0.62	0.45	-0.69	-0.8	0.23	0.35	1	0
PADG_01914	60S ribosomal protein L35	1606.15	1408.15	1.09	0.67	0.13	-0.4	0.25	0.34	0.14	0.01
PADG_05836	60S ribosomal protein L39	9862.32	2322.59	1.16	1.08	0.22	0.08	0.26	0.29	0.07	0.67
PADG_11379	60S ribosomal protein L5	2841.14	4258.29	1.23	1.23	0.3	0.21	0.09	0.09	0	1
PADG_01387	60S ribosomal protein L7	3014.71	7152.13	1.22	1.07	0.29	0.07	0.11	0.11	0	0.89
PADG_04848	60S ribosomal protein L8-B	1767.96	6589.56	1.05	0.68	0.07	-0.38	0.07	0.13	0.06	0
PADG_03651	6-phosphogluconate dehydrogenase, decarboxylating 1	1094.46	567.53	2.41	2.27	1.27	0.82	0.22	0.2	0	1
PADG_07771	6-phosphogluconolactonase	619.03	504.66	1.43	1.07	0.52	0.07	0.27	0.34	0	0.64
PADG_11845	aconitate hydratase, mitochondrial	1337.16	2588.05	1.66	1.77	0.73	0.57	0.09	0.07	0	1
PADG_12077	actin	968.31	3670.64	0.67	0.35	-0.57	-1.06	0.16	0.19	1	0
PADG_12076	actin	2871.4	1135.32	1.72	1.62	0.78	0.48	0.17	0.2	0	1
PADG_02157	actin cytoskeleton-regulatory complex protein END3	636.1	ND	+	ND	+	ND	+	ND	+	ND
PADG_01886	adenosylhomocysteinase	5114.94	3209.32	2.08	1.70	1.06	0.53	0.11	0.12	0	1
PADG_04828	adenylosuccinate lyase	1267.14	614.73	1.97	1.92	0.98	0.65	0.2	0.17	0	1
PADG_00832	adenylosuccinate synthetase	969.84	969.84	*	*	*	*	*	*	*	*
PADG_01440	ADP,ATP carrier protein	727.3	1839.07	0.98	0.88	-0.03	-0.13	0.22	0.25	0.58	0.21
PADG_02833	ADP-ribosylation factor	ND	2358.28	ND	*	ND	*	ND	*	ND	*
PADG_00002	alanyl-tRNA synthetase	888.12	599.43	1.30	0.93	0.38	-0.07	0.15	0.17	0	0.24
PADG_05081	aldehyde dehydrogenase	735.64	3701.25	1.22	1.26	0.29	0.23	0.09	0.07	0	1
PADG_00637	arginase	463.97	1161.3	0.68	0.37	-0.55	-0.99	0.69	0.75	0.97	0
PADG_07105	arginine-tRNA ligase	554.11	554.11	*	*	*	*	*	*	*	*
PADG_01305	argininosuccinate lyase	551.69	ND	+	ND	+	ND	+	ND	+	ND
PADG_00888	argininosuccinate synthase	652.7	652.7	*	1.97	*	0.68	*	0.55	*	0.99
PADG_08376	aspartate-semialdehyde dehydrogenase	2633.05	696.7	2.38	1.68	1.25	0.52	0.21	0.21	0	1
PADG_07042	ATP synthase F1, delta subunit	2655.74	514.91	+	#	+	#	+	#	+	#
PADG_07813	ATP synthase F1, gamma subunit	5080.46	1367.33	2.03	2.39	1.02	0.87	0.18	0.16	0	1
PADG_02561	ATP synthase subunit alpha, mitochondrial	16715.34	14803.09	1.24	0.96	0.31	-0.04	0.05	0.05	0	0.07
PADG_08349	ATP synthase subunit beta, mitochondrial	44454.03	17882.4	2.93	3.39	1.55	1.22	0.08	0.07	0	1
PADG_04729	ATP synthase subunit D, mitochondrial	10759.93	2219.02	3.25	2.10	1.7	0.74	0.11	0.11	0	1
PADG_07789	ATP synthase subunit delta, mitochondrial	18673.08	2026.9	2.53	1.84	1.34	0.61	0.13	0.16	0	1
PADG_00622	ATPase GET3	514.77	ND	*	ND	*	ND	*	ND	*	ND
PADG_04993	ATP-citrate synthase subunit 1	681.97	780.38	1.01	1.05	0.02	0.05	0.16	0.17	0.41	0.73
PADG_11711	ATP-dependent RNA helicase eIF4A	1321.54	523.13	2.68	3.60	1.42	1.28	0.41	0.39	0	1
PADG_04672	ATP-dependent RNA helicase SUB2	697.62	1324.65	+	#	+	#	+	#	+	#
PADG_04570	branched-chain amino acid aminotransferase	979.87	2581.66	0.70	0.76	-0.51	-0.28	0.25	0.2	1	0
PADG_06273	calcineurin subunit B	845.86	ND	+	ND	+	ND	+	ND	+	ND
PADG_02017	calmodulin	6723.5	917.7	2.77	2.59	1.47	0.95	0.43	0.34	0	1
PADG_05683	cell division control protein 48	906.88	3099.11	1.77	1.95	0.82	0.67	0.09	0.07	0	1
PADG_05875	centromere/microtubule-binding protein cbf5	ND	473.9	ND	#	ND	#	ND	#	ND	#
PADG_04034	chaperone DnaJ	2904.89	924.8	1.55	1.51	0.63	0.41	0.17	0.24	0	1
PADG_03562	chaperone DnaK	3447.07	3517.24	1.39	1.07	0.48	0.07	0.05	0.07	0	0.97
PADG_08387	citrate synthase, mitochondrial	567.91	665.29	1.46	1.84	0.55	0.61	0.27	0.31	0	1
PADG_11275	CMGC/MAPK protein kinase	439.81	439.81	*	*	*	*	*	*	*	*
PADG_01061	cyanate hydratase	ND	1053	ND	0.84	ND	-0.18	ND	0.55	ND	0.3
PADG_02763	cyclin-dependent kinase regulatory subunit	763.95	763.95	*	*	*	*	*	*	*	*
PADG_08662	cystathionine beta-lyase	345.82	398.91	+	#	+	#	+	#	+	#
PADG_01418	cysteine dioxygenase	767.22	767.22	*	*	*	*	*	*	*	*
PADG_02726	cysteine synthase	1818.8	898.45	1.77	1.43	0.82	0.36	0.14	0.17	0	1
PADG_06978	cytochrome c	2091.97	2537.01	1.68	1.09	0.75	0.09	0.18	0.29	0	0.75
PADG_04397	cytochrome c oxidase subunit 4, mitochondrial	16957.84	1429.9	3.56	2.89	1.83	1.06	0.2	0.24	0	1
PADG_03163	cytochrome c peroxidase, mitochondrial	1105.06	7277.58	0.76	0.48	-0.39	-0.74	0.07	0.09	1	0
PADG_07782	deoxyuridine 5'-triphosphate nucleotidohydrolase	7098.6	9224.52	1.28	0.83	0.36	-0.19	0.09	0.14	0	0
PADG_06494	dihydrolipoyl dehydrogenase	3106.75	3577.44	1.17	1.23	0.23	0.21	0.09	0.08	0	1
PADG_07970	dihydroorotase, homodimeric type	ND	580.91	ND	#	ND	#	ND	#	ND	#
PADG_00443	dihydropteroate synthase	2037.91	1863.88	1.56	1.52	0.64	0.42	0.1	0.09	0	1
PADG_07609	dihydroxy-acid dehydratase	1382.4	505.55	2.73	2.18	1.45	0.78	0.2	0.27	0	1
PADG_01032	DNA-binding protein, 42 kDa	1140.68	ND	+	ND	+	ND	+	ND	+	ND
PADG_02719	dTDP-4-dehydrorhamnose reductase	513.83	ND	*	ND	*	ND	*	ND	*	ND
PADG_05837	E3 ubiquitin ligase complex SCF subunit sconC	ND	3142.06	ND	1.55	ND	0.44	ND	0.36	ND	0.99
PADG_00692	elongation factor 1-alpha	1950.02	7568.61	0.81	0.30	-0.3	-1.22	0.16	0.12	1	0
PADG_08125	elongation factor 2	8698.38	3952.23	0.99	0.49	-0.01	-0.72	0.11	0.12	0.6	0
PADG_04059	enolase	29089.92	31370.3	1.54	1.28	0.62	0.25	0.03	0.05	0	1
PADG_07977	eukaryotic translation initiation factor 1A, Y-chromosomal	ND	703.74	ND	#	ND	#	ND	#	ND	#
PADG_04083	eukaryotic translation initiation factor 2 subunit gamma	ND	904.31	ND	#	ND	#	ND	#	ND	#
PADG_08033	eukaryotic translation initiation factor 3 subunit B	489.21	557.3	1.97	1.63	0.98	0.49	0.16	0.18	0	1
PADG_02296	eukaryotic translation initiation factor 3 subunit F	ND	1272.06	ND	#	ND	#	ND	#	ND	#
PADG_07888	eukaryotic translation initiation factor 5A	628.13	938.57	+	#	+	#	+	#	+	#
PADG_02691	eukaryotic translation initiation factor 6	2002.04	1055.7	1.61	1.31	0.69	0.27	0.27	0.31	0	0.95
PADG_00254	fatty acid synthase subunit alpha	524.97	554.06	1.62	1.28	0.7	0.25	0.15	0.13	0	1
PADG_06221	formate dehydrogenase	632.87	632.87	*	*	*	*	*	*	*	*
PADG_00668	fructose-bisphosphate aldolase 1	681.05	5922.12	1.18	0.86	0.24	-0.15	0.19	0.15	0.04	0.02
PADG_08119	fumarate hydratase, mitochondrial	949.77	596.3	2.25	2.32	1.17	0.84	0.16	0.15	0	1
PADG_08465	fumarylacetoacetase	718.43	1456.85	1.48	1.20	0.57	0.18	0.11	0.1	0	1
PADG_01479	gamma-glutamyltransferase	1862.55	545.4	2.46	1.77	1.3	0.57	0.25	0.23	0	1
PADG_00451	glucose-6-phosphate isomerase	526.87	919.44	1.78	1.88	0.83	0.63	0.13	0.13	0	1
PADG_05337	glutamate-5-semialdehyde dehydrogenase	487.9	487.9	*	1.32	*	0.28	*	0.32	*	0.96
PADG_06249	glutamine-tRNA ligase	934.15	526.5	1.31	1.01	0.39	0.01	0.19	0.23	0	0.5
PADG_02411	glyceraldehyde-3-phosphate dehydrogenase	11872.9	29527.63	0.91	0.42	-0.13	-0.86	0.06	0.06	1	0
PADG_01963	glycine cleavage system H protein	1151.78	ND	*	ND	*	ND	*	ND	*	ND
PADG_02914	glycine cleavage system T protein	1013.86	1568.09	1.52	1.40	0.6	0.34	0.14	0.15	0	1
PADG_00210	glycine dehydrogenase	3064.66	2083.67	1.57	1.01	0.65	0.01	0.07	0.1	0	0.6
PADG_05183	Grx4 family monothiol glutaredoxin	1644.83	ND	2.13	ND	1.09	ND	0.38	ND	0	ND
PADG_04810	GTP-binding nuclear protein GSP1/Ran	7342.9	6908.5	1.04	0.91	0.05	-0.09	0.12	0.12	0.3	0.1
PADG_01849	GTP-binding protein YchF	416.64	416.64	*	*	*	*	*	*	*	*
PADG_08342	GTP-binding protein ypt1	955.51	2080.59	0.82	0.79	-0.29	-0.23	0.21	0.23	0.99	0
PADG_00282	GTP-binding protein ypt2	2005.04	ND	*	ND	*	ND	*	ND	*	ND
PADG_01530	guanine nucleotide-binding protein subunit beta-like protein	11353.25	2328.76	1.48	1.26	0.57	0.23	0.08	0.09	0	1
PADG_03813	hexokinase	1973.12	587.08	1.44	2.46	0.53	0.9	0.41	0.51	0.01	1
PADG_06756	histidinol dehydrogenase	615.23	859.4	1.26	1.34	0.33	0.29	0.12	0.1	0	1
PADG_00872	histone	18101.32	3651.58	2.79	3.46	1.48	1.24	0.13	0.11	0	1
PADG_07134	histone	17501.65	3673.03	3.53	4.14	1.82	1.42	0.12	0.13	0	1
PADG_00718	histone chaperone asf1	2760.63	625.3	1.77	1.90	0.82	0.64	0.25	0.35	0	1
PADG_05906	histone H2A	1859.72	1587.28	1.93	1.31	0.95	0.27	0.14	0.12	0	1
PADG_05907	histone H2B	18240.2	2977.14	1.68	1.27	0.75	0.24	0.11	0.19	0	1
PADG_00873	histone H3	4340.91	2817.56	2.71	3.94	1.44	1.37	0.11	0.21	0	1
PADG_01615	homocitrate synthase, mitochondrial	2141.48	559.95	2.39	3.19	1.26	1.16	0.23	0.21	0	1
PADG_08466	homogentisate 1,2-dioxygenase	1604.55	1254.23	0.89	0.54	-0.17	-0.62	0.12	0.12	0.99	0
PADG_00663	homoserine dehydrogenase	898.23	ND	1.52	ND	0.6	ND	0.21	ND	0	ND
PADG_04522	homoserine kinase	1291.2	ND	+	ND	+	ND	+	ND	+	ND
PADG_08369	hsp60-like protein	41626.86	31486.72	1.34	0.69	0.42	-0.37	0.03	0.04	0	0
PADG_08118	hsp72-like protein	18274.7	30151.65	1.08	0.87	0.11	-0.14	0.04	0.03	0	0
PADG_02761	hsp75-like protein	798.19	1611.86	1.21	1.22	0.27	0.2	0.16	0.16	0	0.98
PADG_00430	hsp7-like protein	5500.47	11950	0.60	0.99	-0.74	-0.01	0.09	0.07	1	0.43
PADG_07715	hsp90-like protein	1211.18	21307.69	0.91	0.35	-0.14	-1.04	0.07	0.12	1	0
PADG_07946	hypothetical protein	2670.46	4560.11	0.35	0.60	-1.5	-0.51	0.3	0.21	1	0
PADG_03194	hypothetical protein	906.43	2030.96	0.50	0.58	-0.99	-0.55	0.41	0.24	1	0
PADG_08212	hypothetical protein	1071	2557.19	0.59	0.26	-0.75	-1.34	0.26	0.28	1	0
PADG_01209	hypothetical protein	4337.27	5708.9	0.61	0.36	-0.71	-1.02	0.17	0.15	1	0
PADG_04994	hypothetical protein	503.4	2691.59	0.65	0.63	-0.62	-0.46	0.28	0.37	1	0.01
PADG_04731	hypothetical protein	3078.45	2271.51	0.72	0.80	-0.48	-0.22	0.2	0.21	1	0.02
PADG_02592	hypothetical protein	1078.76	15460.89	0.72	0.58	-0.48	-0.54	0.05	0.06	1	0
PADG_02751	hypothetical protein	1939.93	2879.73	0.74	0.41	-0.43	-0.89	0.29	0.22	1	0
PADG_08483	hypothetical protein	816.66	411.76	0.76	0.58	-0.4	-0.54	0.79	0.8	0.85	0.05
PADG_06740	hypothetical protein	1292.59	1358.57	0.76	0.28	-0.4	-1.29	0.26	0.44	1	0
PADG_11832	hypothetical protein	1030.29	3256.39	0.79	0.39	-0.34	-0.94	0.15	0.21	1	0
PADG_07369	hypothetical protein	1105.81	3828.73	0.84	0.52	-0.25	-0.65	0.14	0.19	1	0
PADG_00246	hypothetical protein	829.25	7554.96	0.86	0.83	-0.22	-0.19	0.16	0.23	1	0.05
PADG_04288	hypothetical protein	46354.08	22381.84	0.87	0.68	-0.2	-0.39	0.11	0.11	1	0
PADG_07370	hypothetical protein	635.01	1047.22	0.90	0.61	-0.16	-0.5	0.12	0.16	0.99	0
PADG_06265	hypothetical protein	2378.86	5531	0.90	0.57	-0.15	-0.56	0.1	0.14	1	0
PADG_06805	hypothetical protein	953.4	3306.86	0.91	0.26	-0.13	-1.36	0.16	0.31	0.94	0
PADG_00612	hypothetical protein	1013.4	707.71	0.93	0.79	-0.11	-0.23	0.24	0.44	0.79	0.23
PADG_00324	hypothetical protein	1547.78	1207.99	0.95	0.60	-0.08	-0.51	0.1	0.13	0.94	0
PADG_02888	hypothetical protein	790.8	4454.15	0.99	0.75	-0.02	-0.29	0.11	0.13	0.57	0
PADG_03727	hypothetical protein	879.63	2198.59	0.99	0.68	-0.02	-0.39	0.2	0.21	0.58	0
PADG_06196	hypothetical protein	607.15	2364.81	0.99	0.63	-0.02	-0.46	0.13	0.17	0.65	0
PADG_08715	hypothetical protein	1358.93	3159.75	1.01	0.76	0.01	-0.27	0.17	0.18	0.41	0
PADG_02981	hypothetical protein	675.81	2110.74	1.01	0.65	0.01	-0.43	0.2	0.23	0.51	0
PADG_01687	hypothetical protein	786.47	3955.45	1.01	0.68	0.01	-0.39	0.15	0.17	0.5	0
PADG_05721	hypothetical protein	508.2	6935.54	1.05	0.96	0.07	-0.04	0.09	0.1	0.09	0.28
PADG_04869	hypothetical protein	2332.52	4434.56	1.06	0.98	0.08	-0.02	0.22	0.21	0.28	0.4
PADG_02728	hypothetical protein	723.88	1121.56	1.06	0.84	0.08	-0.18	0.13	0.2	0.15	0.05
PADG_04687	hypothetical protein	627.86	3133.65	1.07	0.73	0.1	-0.32	0.16	0.21	0.15	0
PADG_07031	hypothetical protein	821.11	1118.17	1.08	0.89	0.11	-0.12	0.19	0.24	0.14	0.16
PADG_00171	hypothetical protein	985.47	3625.04	1.08	0.72	0.11	-0.33	0.11	0.12	0.02	0
PADG_03325	hypothetical protein	2438.62	6402.27	1.09	0.78	0.12	-0.25	0.15	0.15	0.07	0
PADG_06568	hypothetical protein	3114.04	11264.29	1.09	1.13	0.12	0.12	0.13	0.1	0.02	0.98
PADG_11227	hypothetical protein	1578.9	1496.38	1.09	0.84	0.12	-0.17	0.1	0.12	0.02	0
PADG_03149	hypothetical protein	434.51	787.89	1.10	1.02	0.14	0.02	0.28	0.28	0.18	0.57
PADG_03244	hypothetical protein	583.74	923.19	1.12	1.00	0.16	0	0.48	0.47	0.21	0.52
PADG_03095	hypothetical protein	4870.74	2391.55	1.13	0.68	0.18	-0.39	0.13	0.15	0	0
PADG_02260	hypothetical protein	1599.95	2012.75	1.13	1.02	0.18	0.02	0.25	0.27	0.1	0.53
PADG_01706	hypothetical protein	3508.43	1952.6	1.14	0.87	0.19	-0.14	0.15	0.13	0	0.03
PADG_04588	hypothetical protein	4388.51	4155.52	1.19	0.74	0.25	-0.3	0.13	0.17	0	0
PADG_02555	hypothetical protein	1870.26	3123.77	1.21	0.94	0.27	-0.06	0.1	0.11	0	0.15
PADG_05523	hypothetical protein	674.18	511.78	1.21	0.95	0.27	-0.05	0.24	0.26	0	0.38
PADG_02764	hypothetical protein	2003.44	2170.39	1.21	0.71	0.28	-0.34	0.16	0.16	0	0
PADG_05739	hypothetical protein	579.21	418.46	1.23	1.13	0.3	0.12	0.29	0.29	0.01	0.79
PADG_07508	hypothetical protein	1751.38	1953.61	1.23	1.00	0.3	0	0.19	0.22	0	0.51
PADG_05904	hypothetical protein	530.72	735.17	1.23	0.84	0.3	-0.18	0.14	0.21	0	0.03
PADG_02896	hypothetical protein	3658.17	4916.36	1.25	1.13	0.32	0.12	0.08	0.08	0	0.99
PADG_02145	hypothetical protein	584.69	1818.25	1.25	1.04	0.32	0.04	0.15	0.15	0	0.69
PADG_07606	hypothetical protein	559.34	1789.56	1.26	1.15	0.33	0.14	0.11	0.1	0	1
PADG_07836	hypothetical protein	1058.8	935.79	1.26	0.97	0.33	-0.03	0.24	0.25	0	0.37
PADG_03431	hypothetical protein	612.5	573.1	1.27	1.19	0.34	0.17	0.21	0.2	0	0.95
PADG_11413	hypothetical protein	1127.95	782.59	1.27	0.81	0.35	-0.21	0.19	0.22	0	0.07
PADG_01711	hypothetical protein	1375.37	2313.44	1.30	1.04	0.38	0.04	0.1	0.12	0	0.7
PADG_00183	hypothetical protein	1497.76	2018.44	1.31	0.91	0.39	-0.09	0.15	0.22	0	0.17
PADG_06290	hypothetical protein	3037.26	1304.54	1.31	1.06	0.39	0.06	0.16	0.19	0	0.68
PADG_01935	hypothetical protein	837.32	726.98	1.34	1.51	0.42	0.41	0.33	0.29	0	1
PADG_00405	hypothetical protein	415.22	580.23	1.35	1.16	0.43	0.15	0.31	0.38	0.01	0.72
PADG_06876	hypothetical protein	1647.56	734.85	1.36	1.57	0.44	0.45	0.34	0.39	0.01	0.98
PADG_01363	hypothetical protein	1577.81	7974.79	1.38	1.01	0.46	0.01	0.09	0.13	0	0.6
PADG_08442	hypothetical protein	1556.13	1525.78	1.38	0.90	0.46	-0.11	0.11	0.17	0	0.12
PADG_05203	hypothetical protein	1614.21	703.81	1.39	0.78	0.47	-0.25	0.31	0.47	0	0.15
PADG_06033	hypothetical protein	990.32	1572.24	1.39	1.13	0.47	0.12	0.15	0.17	0	0.91
PADG_05893	hypothetical protein	1448.87	1518.06	1.39	1.31	0.48	0.27	0.14	0.17	0	0.99
PADG_04312	hypothetical protein	435.09	ND	1.40	ND	0.49	ND	0.47	ND	0.02	ND
PADG_04439	hypothetical protein	11250.78	4245.99	1.41	0.96	0.5	-0.04	0.19	0.2	0	0.35
PADG_06488	hypothetical protein	19095.81	8998.91	1.42	1.25	0.51	0.22	0.05	0.07	0	1
PADG_00207	hypothetical protein	793.49	1738.22	1.42	1.04	0.51	0.04	0.36	0.28	0	0.58
PADG_06546	hypothetical protein	739.86	499.08	1.43	1.60	0.52	0.47	0.13	0.13	0	1
PADG_00778	hypothetical protein	482.87	439.53	1.43	1.35	0.52	0.3	0.21	0.26	0	0.98
PADG_05587	hypothetical protein	617.42	904.89	1.44	1.34	0.53	0.29	0.39	0.44	0	0.85
PADG_00402	hypothetical protein	453.52	499.37	1.45	0.80	0.54	-0.22	0.3	0.34	0	0.14
PADG_07023	hypothetical protein	1083.11	904.06	1.45	1.06	0.54	0.06	0.18	0.19	0	0.7
PADG_08615	hypothetical protein	681.04	3299.14	1.47	0.94	0.56	-0.06	0.1	0.13	0	0.21
PADG_02456	hypothetical protein	645.01	421.09	1.47	0.87	0.56	-0.14	0.42	0.55	0	0.33
PADG_06515	hypothetical protein	28036.56	19368.41	1.48	1.27	0.57	0.24	0.09	0.08	0	1
PADG_02785	hypothetical protein	6273.21	9518.65	1.48	1.51	0.57	0.41	0.05	0.05	0	1
PADG_03176	hypothetical protein	520.17	643.52	1.49	1.30	0.58	0.26	0.32	0.33	0	0.91
PADG_03671	hypothetical protein	789.12	1470.88	1.51	1.45	0.59	0.37	0.25	0.24	0	1
PADG_04866	hypothetical protein	1188.82	1209.65	1.51	1.22	0.59	0.2	0.17	0.16	0	1
PADG_02845	hypothetical protein	2809.36	2094.47	1.51	1.23	0.59	0.21	0.11	0.13	0	1
PADG_01867	hypothetical protein	453.9	411.54	1.52	1.14	0.6	0.13	0.25	0.28	0	0.76
PADG_07964	hypothetical protein	866.17	1026.76	1.53	1.06	0.61	0.06	0.27	0.38	0	0.66
PADG_00824	hypothetical protein	1685.96	1905.06	1.53	1.11	0.61	0.1	0.13	0.14	0	0.91
PADG_01797	hypothetical protein	536.58	576.86	1.53	2.05	0.61	0.72	0.37	0.45	0	1
PADG_05034	hypothetical protein	867.11	ND	1.55	ND	0.63	ND	0.33	ND	0	ND
PADG_07558	hypothetical protein	523.42	735.58	1.56	1.49	0.64	0.4	0.31	0.41	0	0.96
PADG_07674	hypothetical protein	2074.37	1426.89	1.56	1.27	0.64	0.24	0.19	0.27	0	0.96
PADG_04636	hypothetical protein	1618.93	1042.89	1.57	1.43	0.65	0.36	0.14	0.14	0	1
PADG_11424	hypothetical protein	550.08	573.94	1.57	1.23	0.65	0.21	0.23	0.2	0	0.97
PADG_00446	hypothetical protein	1406.89	1143.08	1.57	1.20	0.65	0.18	0.25	0.31	0	0.85
PADG_05474	hypothetical protein	1067.5	649.06	1.58	1.15	0.66	0.14	0.35	0.54	0	0.65
PADG_05032	hypothetical protein	4917.89	1379.42	1.59	1.20	0.67	0.18	0.19	0.12	0	0.99
PADG_01455	hypothetical protein	409.15	ND	1.59	ND	0.67	ND	0.38	ND	0	ND
PADG_07714	hypothetical protein	1009.12	563.2	1.59	1.16	0.67	0.15	0.23	0.26	0	0.84
PADG_05798	hypothetical protein	27710.18	15415.68	1.61	1.34	0.69	0.29	0.06	0.07	0	1
PADG_00615	hypothetical protein	3316.5	3346.65	1.61	1.16	0.69	0.15	0.11	0.15	0	0.96
PADG_07190	hypothetical protein	811.6	869.74	1.61	1.22	0.69	0.2	0.15	0.17	0	1
PADG_03680	hypothetical protein	1506.31	1545.88	1.61	1.20	0.69	0.18	0.14	0.21	0	0.94
PADG_00463	hypothetical protein	625.24	ND	1.61	ND	0.69	ND	0.39	ND	0	ND
PADG_03967	hypothetical protein	9826.24	3676.41	1.62	1.45	0.7	0.37	0.13	0.14	0	1
PADG_06180	hypothetical protein	582.21	454.44	1.62	1.25	0.7	0.22	0.31	0.37	0	0.9
PADG_04934	hypothetical protein	619.2	575.91	1.64	1.25	0.71	0.22	0.23	0.28	0	0.93
PADG_04939	hypothetical protein	1187.44	1703.1	1.64	1.68	0.71	0.52	0.16	0.14	0	1
PADG_06182	hypothetical protein	1138.44	547.8	1.64	1.22	0.71	0.2	0.22	0.22	0	0.92
PADG_00849	hypothetical protein	1157.96	1288.84	1.65	0.89	0.72	-0.12	0.14	0.22	0	0.11
PADG_05277	hypothetical protein	6324.08	3204.09	1.65	1.34	0.72	0.29	0.1	0.12	0	1
PADG_06382	hypothetical protein	3416.52	2406.8	1.66	1.13	0.73	0.12	0.14	0.13	0	0.95
PADG_04076	hypothetical protein	4872.84	1047.04	1.68	1.30	0.75	0.26	0.16	0.16	0	1
PADG_04440	hypothetical protein	23558.55	22781.86	1.68	1.42	0.75	0.35	0.2	0.07	0	1
PADG_02343	hypothetical protein	2421.65	2272.85	1.68	1.16	0.75	0.15	0.09	0.14	0	0.99
PADG_07274	hypothetical protein	730.39	809.59	1.68	1.14	0.75	0.13	0.24	0.25	0	0.8
PADG_04148	hypothetical protein	1272.3	1075.17	1.71	1.31	0.77	0.27	0.11	0.12	0	1
PADG_05239	hypothetical protein	1188.96	949.14	1.71	1.65	0.77	0.5	0.34	0.39	0	0.99
PADG_04167	hypothetical protein	1162.18	456.35	1.71	1.43	0.77	0.36	0.18	0.2	0	1
PADG_02652	hypothetical protein	36483.8	10420.25	1.72	1.23	0.78	0.21	0.07	0.07	0	1
PADG_03424	hypothetical protein	1345.75	1565.4	1.73	1.52	0.79	0.42	0.13	0.13	0	1
PADG_02183	hypothetical protein	1018.86	765.46	1.73	1.19	0.79	0.17	0.25	0.41	0	0.85
PADG_04966	hypothetical protein	728.43	ND	1.73	ND	0.79	ND	0.65	ND	0.01	ND
PADG_01565	hypothetical protein	1281.42	1309.53	1.73	1.90	0.79	0.64	0.1	0.12	0	1
PADG_07081	hypothetical protein	1912.68	1312.2	1.74	1.22	0.8	0.2	0.21	0.25	0	0.94
PADG_03982	hypothetical protein	3157.46	1617.8	1.75	1.20	0.81	0.18	0.15	0.14	0	0.99
PADG_02246	hypothetical protein	1023.67	1864.44	1.75	1.43	0.81	0.36	0.19	0.2	0	1
PADG_06992	hypothetical protein	8275.4	7977	1.77	1.28	0.82	0.25	0.09	0.11	0	1
PADG_07435	hypothetical protein	3257.33	3046.41	1.77	1.28	0.82	0.25	0.18	0.15	0	1
PADG_01079	hypothetical protein	1039.02	463.58	1.77	1.22	0.82	0.2	0.21	0.22	0	0.93
PADG_02967	hypothetical protein	5909.55	4202.33	1.77	1.25	0.82	0.22	0.11	0.1	0	1
PADG_05703	hypothetical protein	1162.77	543.47	1.78	1.34	0.83	0.29	0.27	0.38	0	0.95
PADG_02022	hypothetical protein	3539.13	2427.48	1.79	0.90	0.84	-0.1	0.2	0.22	0	0.25
PADG_07670	hypothetical protein	841.85	ND	1.79	ND	0.84	ND	0.44	ND	0	ND
PADG_03965	hypothetical protein	2323.35	3084.57	1.80	1.07	0.85	0.07	0.3	0.24	0	0.69
PADG_00602	hypothetical protein	1103.03	ND	1.80	ND	0.85	ND	0.45	ND	0	ND
PADG_07460	hypothetical protein	1941.91	487.7	1.83	1.54	0.87	0.43	0.14	0.13	0	1
PADG_00694	hypothetical protein	1375.38	ND	1.84	ND	0.88	ND	0.52	ND	0	ND
PADG_11950	hypothetical protein	3845.45	6738.94	1.84	1.26	0.88	0.23	0.08	0.09	0	1
PADG_00921	hypothetical protein	8475.1	2142.99	1.88	0.64	0.91	-0.45	0.21	0.23	0	0
PADG_07950	hypothetical protein	622.95	433.94	1.88	1.79	0.91	0.58	0.19	0.22	0	1
PADG_02092	hypothetical protein	1528.71	881.71	1.89	1.35	0.92	0.3	0.17	0.19	0	1
PADG_03219	hypothetical protein	2427.08	2436.66	1.91	1.30	0.93	0.26	0.28	0.27	0	0.96
PADG_04057	hypothetical protein	2426.37	536.41	1.91	1.28	0.93	0.25	0.26	0.23	0	0.98
PADG_04311	hypothetical protein	1688.29	ND	1.92	ND	0.94	ND	0.26	ND	0	ND
PADG_05820	hypothetical protein	1428.19	606.66	1.92	1.60	0.94	0.47	0.13	0.2	0	1
PADG_07469	hypothetical protein	797.44	465.89	1.93	*	0.95	*	0.59	*	0	*
PADG_00608	hypothetical protein	457.47	508.91	1.93	1.39	0.95	0.33	0.26	0.23	0	1
PADG_07064	hypothetical protein	1199.21	618.4	1.95	1.27	0.96	0.24	0.27	0.26	0	0.94
PADG_03544	hypothetical protein	1926.53	456.22	1.95	1.99	0.96	0.69	0.21	0.24	0	1
PADG_07515	hypothetical protein	614.94	573.32	1.96	1.49	0.97	0.4	0.32	0.39	0	0.99
PADG_06314	hypothetical protein	924.76	926.1	1.97	1.04	0.98	0.04	0.16	0.16	0	0.66
PADG_03020	hypothetical protein	565.67	ND	1.99	ND	0.99	ND	0.29	ND	0	ND
PADG_06490	hypothetical protein	4731.69	1170.68	2.03	1.48	1.02	0.39	0.1	0.14	0	1
PADG_04229	hypothetical protein	646.38	583.82	2.04	1.57	1.03	0.45	0.22	0.2	0	1
PADG_03963	hypothetical protein	15324.12	6432.9	2.06	1.84	1.04	0.61	0.06	0.08	0	1
PADG_02206	hypothetical protein	613.07	707.66	2.07	1.51	1.05	0.41	0.4	0.42	0	0.95
PADG_03221	hypothetical protein	1073.19	769.99	2.08	2.03	1.06	0.71	0.11	0.11	0	1
PADG_08034	hypothetical protein	1892.29	1836.66	2.10	1.48	1.07	0.39	0.28	0.25	0	1
PADG_05922	hypothetical protein	5325.3	3500.33	2.10	1.75	1.07	0.56	0.1	0.1	0	1
PADG_04379	hypothetical protein	11812.75	4552.74	2.10	1.99	1.07	0.69	0.13	0.08	0	1
PADG_08368	hypothetical protein	3283.04	716.93	2.11	0.35	1.08	-1.06	0.37	0.62	0	0
PADG_04165	hypothetical protein	4691.21	691.24	2.13	1.43	1.09	0.36	0.12	0.15	0	1
PADG_00255	hypothetical protein	1306.32	889.54	2.16	1.75	1.11	0.56	0.12	0.11	0	1
PADG_01366	hypothetical protein	8527.01	3175.48	2.22	1.82	1.15	0.6	0.35	0.41	0	1
PADG_04761	hypothetical protein	1036.62	667.61	2.25	1.84	1.17	0.61	0.13	0.17	0	1
PADG_02825	hypothetical protein	1929.44	936.12	2.27	1.52	1.18	0.42	0.3	0.46	0	0.94
PADG_05884	hypothetical protein	7917.75	ND	2.28	ND	1.19	ND	0.25	ND	0	ND
PADG_06165	hypothetical protein	883.23	ND	2.30	ND	1.2	ND	0.46	ND	0	ND
PADG_07907	hypothetical protein	2642.52	1231.54	2.30	1.46	1.2	0.38	0.11	0.14	0	1
PADG_05160	hypothetical protein	567.55	435.87	2.30	1.88	1.2	0.63	0.14	0.17	0	1
PADG_07249	hypothetical protein	989.85	460.77	2.35	1.99	1.23	0.69	0.19	0.18	0	1
PADG_00422	hypothetical protein	12255.21	3501.22	2.38	1.70	1.25	0.53	0.07	0.1	0	1
PADG_00828	hypothetical protein	837.5	ND	2.41	ND	1.27	ND	0.46	ND	0	ND
PADG_00912	hypothetical protein	1876.92	ND	2.46	ND	1.3	ND	0.12	ND	0	ND
PADG_01852	hypothetical protein	1537.32	991	2.50	2.20	1.32	0.79	0.2	0.21	0	1
PADG_00676	hypothetical protein	1208.35	568.85	2.53	1.90	1.34	0.64	0.21	0.2	0	1
PADG_07523	hypothetical protein	2916.74	600.23	2.55	1.92	1.35	0.65	0.13	0.14	0	1
PADG_00688	hypothetical protein	1411.4	2589.81	2.57	2.12	1.36	0.75	0.15	0.17	0	1
PADG_03210	hypothetical protein	2128.5	1477.99	2.57	1.86	1.36	0.62	0.34	0.5	0	0.99
PADG_01558	hypothetical protein	556.29	469.31	2.64	2.03	1.4	0.71	0.43	0.48	0	0.99
PADG_00317	hypothetical protein	1165.76	356.85	2.66	4.10	1.41	1.41	0.29	0.35	0	1
PADG_02733	hypothetical protein	2205.58	895.18	2.68	1.80	1.42	0.59	0.17	0.2	0	1
PADG_02030	hypothetical protein	4849.77	2932.07	2.71	2.23	1.44	0.8	0.13	0.15	0	1
PADG_03203	hypothetical protein	6023.64	1831.27	2.73	1.72	1.45	0.54	0.11	0.15	0	1
PADG_11062	hypothetical protein	6178.35	817.23	2.79	2.23	1.48	0.8	0.28	0.39	0	1
PADG_08480	hypothetical protein	631.36	646.53	2.81	3.86	1.49	1.35	0.34	0.4	0	1
PADG_05538	hypothetical protein	2068.43	517.74	2.83	1.99	1.5	0.69	0.46	0.27	0	1
PADG_01010	hypothetical protein	1473.23	690.72	2.97	2.20	1.57	0.79	0.11	0.16	0	1
PADG_05393	hypothetical protein	1092.36	487.75	3.20	2.80	1.68	1.03	0.46	0.44	0	1
PADG_02759	hypothetical protein	3731.33	787.37	3.76	3.42	1.91	1.23	0.36	0.5	0	1
PADG_05750	hypothetical protein	40028.16	4381.04	2.89	2.51	1.96	0.92	0.12	0.14	0	1
PADG_01954	hypothetical protein	2543.95	1379.02	4.72	1.99	2.24	0.69	0.27	0.2	0	1
PADG_11468	hypothetical protein	457.76	471.59	+	#	+	#	+	#	+	#
PADG_12437	hypothetical protein	604.69	391.93	+	#	+	#	+	#	+	#
PADG_03526	hypothetical protein	694.82	467.91	+	#	+	#	+	#	+	#
PADG_01994	hypothetical protein	1001.71	ND	+	ND	+	ND	+	ND	+	ND
PADG_03827	hypothetical protein	2950.62	2531.19	+	#	+	#	+	#	+	#
PADG_00067	hypothetical protein	3632.22	1667.1	+	#	+	#	+	#	+	#
PADG_01151	hypothetical protein	551.42	475.45	+	#	+	#	+	#	+	#
PADG_06734	hypothetical protein	2246.48	2200.35	+	#	+	#	+	#	+	#
PADG_11131	hypothetical protein	894.96	367.02	+	#	+	#	+	#	+	#
PADG_02745	hypothetical protein	3903.78	ND	+	ND	+	ND	+	ND	+	ND
PADG_00496	hypothetical protein	941.2	515.07	+	#	+	#	+	#	+	#
PADG_03943	hypothetical protein	736.23	388.32	+	#	+	#	+	#	+	#
PADG_06336	hypothetical protein	1040.98	ND	+	ND	+	ND	+	ND	+	ND
PADG_04899	hypothetical protein	614.27	1103.5	+	#	+	#	+	#	+	#
PADG_03788	hypothetical protein	833.59	ND	+	ND	+	ND	+	ND	+	ND
PADG_01529	hypothetical protein	645.78	640.89	+	#	+	#	+	#	+	#
PADG_08270	hypothetical protein	493.3	543.05	+	#	+	#	+	#	+	#
PADG_05783	hypothetical protein	752.27	3596.45	+	#	+	#	+	#	+	#
PADG_03869	hypothetical protein	639.41	785.98	+	#	+	#	+	#	+	#
PADG_08436	hypothetical protein	1263.02	ND	+	ND	+	ND	+	ND	+	ND
PADG_05556	hypothetical protein	1218.06	ND	+	ND	+	ND	+	ND	+	ND
PADG_06547	hypothetical protein	1233.13	ND	+	ND	+	ND	+	ND	+	ND
PADG_11936	hypothetical protein	600.69	1140.44	+	#	+	#	+	#	+	#
PADG_02307	hypothetical protein	473.88	740.98	+	#	+	#	+	#	+	#
PADG_03735	hypothetical protein	422.42	574.84	+	#	+	#	+	#	+	#
PADG_08108	hypothetical protein	714.31	526.04	+	#	+	#	+	#	+	#
PADG_05193	hypothetical protein	1126.68	465.6	+	#	+	#	+	#	+	#
PADG_02783	hypothetical protein	551.57	ND	+	ND	+	ND	+	ND	+	ND
PADG_04374	hypothetical protein	934.38	722.26	+	#	+	#	+	#	+	#
PADG_04981	hypothetical protein	531.32	881.57	+	#	+	#	+	#	+	#
PADG_03278	hypothetical protein	687.16	ND	+	ND	+	ND	+	ND	+	ND
PADG_03696	hypothetical protein	1527.97	580.16	+	#	+	#	+	#	+	#
PADG_08666	hypothetical protein	1921.5	ND	+	ND	+	ND	+	ND	+	ND
PADG_00513	hypothetical protein	484.5	567.59	+	#	+	#	+	#	+	#
PADG_00298	hypothetical protein	573.38	ND	+	ND	+	ND	+	ND	+	ND
PADG_02352	hypothetical protein	2443.46	ND	+	ND	+	ND	+	ND	+	ND
PADG_00822	hypothetical protein	439.09	651.49	+	#	+	#	+	#	+	#
PADG_04952	hypothetical protein	571.94	491.31	+	#	+	#	+	#	+	#
PADG_11958	hypothetical protein	2502.26	860.29	+	#	+	#	+	#	+	#
PADG_00211	hypothetical protein	2047.72	2047.72	*	*	*	*	*	*	*	*
PADG_04475	hypothetical protein	1040.31	ND	*	ND	*	ND	*	ND	*	ND
PADG_01052	hypothetical protein	1096.69	ND	*	ND	*	ND	*	ND	*	ND
PADG_01281	hypothetical protein	463.22	463.22	*	*	*	*	*	*	*	*
PADG_07627	hypothetical protein	628.84	628.84	*	1.93	*	0.66	*	0.37	*	1
PADG_04193	hypothetical protein	532.75	ND	*	ND	*	ND	*	ND	*	ND
PADG_05356	hypothetical protein	871.15	871.15	*	0.56	*	-0.58	*	0.33	*	0
PADG_01486	hypothetical protein	1481.15	ND	*	ND	*	ND	*	ND	*	ND
PADG_01488	hypothetical protein	1980.81	1980.81	*	*	*	*	*	*	*	*
PADG_08263	hypothetical protein	553.08	ND	*	ND	*	ND	*	ND	*	ND
PADG_04343	hypothetical protein	620.43	620.43	*	*	*	*	*	*	*	*
PADG_07287	hypothetical protein	579.21	579.21	*	*	*	*	*	*	*	*
PADG_00172	hypothetical protein	506.63	506.63	*	*	*	*	*	*	*	*
PADG_03631	hypothetical protein	1247.15	ND	*	ND	*	ND	*	ND	*	ND
PADG_03660	hypothetical protein	860.43	860.43	*	*	*	*	*	*	*	*
PADG_02797	hypothetical protein	428.68	428.68	*	*	*	*	*	*	*	*
PADG_07870	hypothetical protein	638.76	638.76	*	*	*	*	*	*	*	*
PADG_01621	hypothetical protein	710.05	ND	*	ND	*	ND	*	ND	*	ND
PADG_03686	hypothetical protein	395.76	395.76	*	*	*	*	*	*	*	*
PADG_03514	hypothetical protein	761.58	ND	*	ND	*	ND	*	ND	*	ND
PADG_00355	hypothetical protein	802.28	802.28	*	*	*	*	*	*	*	*
PADG_08394	hypothetical protein	904.65	904.65	*	0.61	*	-0.49	*	0.35	*	0
PADG_07412	hypothetical protein	861.11	861.11	*	*	*	*	*	*	*	*
PADG_00215	hypothetical protein	579.63	579.63	*	*	*	*	*	*	*	*
PADG_07416	hypothetical protein	474.55	ND	*	ND	*	ND	*	ND	*	ND
PADG_03627	hypothetical protein	ND	674.79	ND	0.64	ND	-0.44	ND	0.35	ND	0.01
PADG_01228	hypothetical protein	ND	976.74	ND	0.73	ND	-0.32	ND	0.37	ND	0.08
PADG_11833	hypothetical protein	ND	661.77	ND	0.94	ND	-0.06	ND	0.4	ND	0.38
PADG_05490	hypothetical protein	ND	996.74	ND	0.97	ND	-0.03	ND	0.32	ND	0.46
PADG_00322	hypothetical protein	ND	1385.44	ND	1.00	ND	0	ND	0.3	ND	0.46
PADG_04107	hypothetical protein	ND	896.68	ND	1.01	ND	0.01	ND	0.45	ND	0.55
PADG_01665	hypothetical protein	ND	475.57	ND	1.04	ND	0.04	ND	0.55	ND	0.5
PADG_00144	hypothetical protein	ND	3359.54	ND	1.07	ND	0.07	ND	0.28	ND	0.66
PADG_12447	hypothetical protein	ND	989.29	ND	1.27	ND	0.24	ND	0.36	ND	0.83
PADG_07293	hypothetical protein	ND	522.09	ND	1.30	ND	0.26	ND	0.33	ND	0.9
PADG_06144	hypothetical protein	ND	1194.56	ND	1.32	ND	0.28	ND	0.3	ND	0.95
PADG_06289	hypothetical protein	ND	749.22	ND	1.40	ND	0.34	ND	0.49	ND	0.94
PADG_00945	hypothetical protein	ND	1210.25	ND	1.52	ND	0.42	ND	0.69	ND	0.88
PADG_01243	hypothetical protein	ND	838.81	ND	2.16	ND	0.77	ND	0.24	ND	1
PADG_06087	hypothetical protein	ND	578.79	ND	2.23	ND	0.8	ND	0.63	ND	1
PADG_05517	hypothetical protein	ND	620.8	ND	2.69	ND	0.99	ND	0.41	ND	1
PADG_04559	hypothetical protein	ND	1333.07	ND	*	ND	*	ND	*	ND	*
PADG_02048	hypothetical protein	ND	636.86	ND	*	ND	*	ND	*	ND	*
PADG_00344	hypothetical protein	ND	1008.02	ND	*	ND	*	ND	*	ND	*
PADG_07733	hypothetical protein	ND	693.88	ND	*	ND	*	ND	*	ND	*
PADG_07930	hypothetical protein	ND	1565.37	ND	#	ND	#	ND	#	ND	#
PADG_01871	hypothetical protein	ND	725.03	ND	#	ND	#	ND	#	ND	#
PADG_05608	hypothetical protein	ND	512.66	ND	#	ND	#	ND	#	ND	#
PADG_02637	hypothetical protein	ND	795.87	ND	#	ND	#	ND	#	ND	#
PADG_01424	hypothetical protein	ND	435.72	ND	#	ND	#	ND	#	ND	#
PADG_04686	hypothetical protein	ND	496.27	ND	#	ND	#	ND	#	ND	#
PADG_07029	hypothetical protein	ND	522.48	ND	#	ND	#	ND	#	ND	#
PADG_00066	hypothetical protein	ND	384.07	ND	#	ND	#	ND	#	ND	#
PADG_04442	hypothetical protein	ND	452.53	ND	#	ND	#	ND	#	ND	#
PADG_04175	inorganic pyrophosphatase	3036.59	2372.74	1.62	1.42	0.7	0.35	0.08	0.1	0	1
PADG_07585	inosine-5'-monophosphate dehydrogenase	1285.04	914.88	1.97	1.80	0.98	0.59	0.16	0.14	0	1
PADG_01483	isocitrate lyase	782.07	1754.4	1.59	1.45	0.67	0.37	0.09	0.08	0	1
PADG_03449	isopentenyl-diphosphate delta-isomerase	795.96	795.96	*	*	*	*	*	*	*	*
PADG_06429	ketol-acid reductoisomerase, mitochondrial	1960.68	1802.97	1.83	1.05	0.87	0.05	0.21	0.18	0	0.71
PADG_00349	kynureninase	559.31	ND	1.33	ND	0.41	ND	0.29	ND	0	ND
PADG_05310	leukotriene A-4 hydrolase	2329.58	560.13	2.17	1.30	1.12	0.26	0.18	0.24	0	0.98
PADG_08472	lysine-tRNA ligase	503.01	503.01	*	*	*	*	*	*	*	*
PADG_07210	malate dehydrogenase, NAD-dependent	14465.84	19432.4	1.06	0.73	0.08	-0.31	0.05	0.06	0	0
PADG_08054	malate dehydrogenase, NAD-dependent	6213.22	10751.52	1.46	1.22	0.55	0.2	0.06	0.07	0	1
PADG_08464	maleylacetoacetate isomerase	2701.41	1624.24	1.10	0.71	0.14	-0.34	0.25	0.28	0.13	0.03
PADG_01372	mannitol-1-phosphate 5-dehydrogenase	798.49	5110.64	1.13	0.88	0.17	-0.13	0.09	0.07	0	0
PADG_02132	mannose-6-phosphate isomerase	ND	493.64	ND	1.25	ND	0.22	ND	0.57	ND	0.78
PADG_04709	methyl-isocitrate lyase	1366.54	900.43	1.56	1.55	0.64	0.44	0.15	0.13	0	1
PADG_01564	methylmalonate-semialdehyde dehydrogenase	546.25	2018.64	1.13	0.90	0.18	-0.1	0.11	0.12	0	0.09
PADG_03522	methylthioadenosine phosphorylase	1437.78	479.79	3.01	1.45	1.59	0.37	0.23	0.2	0	1
PADG_03274	mitochondrial import inner membrane translocase subunit tim9	3109.89	ND	+	ND	+	ND	+	ND	+	ND
PADG_04125	mitochondrial presequence protease	447.07	384.97	1.80	1.30	0.85	0.26	0.13	0.2	0	1
PADG_06766	mitochondrial-processing peptidase subunit beta	3201	944.78	2.31	3.19	1.21	1.16	0.13	0.15	0	1
PADG_04689	N-acetyl-gamma-glutamyl-phosphate reductase	532.7	686.12	+	#	+	#	+	#	+	#
PADG_07749	NAD(P)H:quinone oxidoreductase, type IV	63456.09	41840.44	2.35	1.60	1.23	0.47	0.06	0.08	0	1
PADG_04516	NADP-specific glutamate dehydrogenase	1576.71	651.57	1.91	1.60	0.93	0.47	0.16	0.16	0	1
PADG_04730	nascent polypeptide-associated complex subunit alpha	18126.22	2511.44	1.88	1.90	0.91	0.64	0.11	0.14	0	1
PADG_04657	nascent polypeptide-associated complex subunit beta	5769.23	2060.21	3.78	3.32	1.92	1.2	0.21	0.3	0	1
PADG_05947	nicotinate-nucleotide diphosphorylase	11884.09	2191.2	1.73	1.39	0.79	0.33	0.13	0.11	0	1
PADG_00656	non-histone chromosomal protein 6	2992.07	6855.17	2.11	1.65	1.08	0.5	0.32	0.33	0	0.99
PADG_03073	nuclear movement protein nudC	8082.11	4163.34	1.77	1.32	0.82	0.28	0.11	0.14	0	1
PADG_07524	nucleoside diphosphate kinase	47266.47	22397.21	1.21	0.73	0.27	-0.32	0.06	0.05	0	0
PADG_08406	O-acetylhomoserine	16850.46	5118.38	2.01	1.36	1.01	0.31	0.06	0.08	0	1
PADG_01762	oxoglutarate dehydrogenase	1134.35	566.44	1.59	1.40	0.67	0.34	0.08	0.1	0	1
PADG_12323	peptidyl-prolyl cis-trans isomerase	804.14	1182.57	1.85	1.39	0.89	0.33	0.2	0.22	0	1
PADG_04092	peptidyl-prolyl cis-trans isomerase B	963.96	1511.29	1.25	1.00	0.32	0	0.2	0.22	0	0.52
PADG_00001	peptidyl-prolyl cis-trans isomerase H	1323.71	1118.82	1.23	0.95	0.3	-0.05	0.25	0.24	0.01	0.37
PADG_07953	peptidyl-prolyl cis-trans isomerase-like 1	3686.22	4167.2	0.90	0.91	-0.15	-0.09	0.12	0.1	1	0.05
PADG_08651	peroxisomal hydratase-dehydrogenase-epimerase	724.34	724.34	*	*	*	*	*	*	*	*
PADG_07582	phenylalanine-tRNA ligase, alpha subunit	ND	691.71	ND	1.75	ND	0.56	ND	0.41	ND	0.99
PADG_08503	phosphoenolpyruvate carboxykinase [ATP]	1337.49	3649.92	1.64	1.55	0.71	0.44	0.07	0.08	0	1
PADG_11132	phosphoglucomutase	1205.72	1179.34	1.61	1.67	0.69	0.51	0.09	0.12	0	1
PADG_05896	phosphoglycerate dehydrogenase	ND	313.7	ND	#	ND	#	ND	#	ND	#
PADG_01896	phosphoglycerate kinase	2190.5	6553.54	0.67	0.58	-0.58	-0.54	0.12	0.14	1	0
PADG_06297	phosphoribosylamine-glycine ligase	ND	410.55	ND	#	ND	#	ND	#	ND	#
PADG_04099	phosphoribosylaminoimidazolecarboxamide formyltransferase/IMP cyclohydrolase	ND	4076.77	ND	0.99	ND	-0.01	ND	0.1	ND	0.51
PADG_08391	plasma membrane ATPase	1062.2	442.15	1.41	1.77	0.5	0.57	0.34	0.36	0	1
PADG_07884	polyadenylate-binding protein, cytoplasmic and nuclear	490.6	459.2	1.80	2.64	0.85	0.97	0.12	0.15	0	1
PADG_01605	polyubiquitin	1112.16	2988.76	1.40	2.25	0.49	0.81	0.19	0.12	0	1
PADG_04796	pre-mRNA-splicing factor rse1	445.01	687.99	+	#	+	#	+	#	+	#
PADG_11679	proliferating cell nuclear antigen	4415.85	2531.18	1.96	1.32	0.97	0.28	0.08	0.08	0	1
PADG_08087	proteasome component PRE3	5539.32	3752.07	1.54	1.00	0.62	0	0.12	0.16	0	0.5
PADG_02735	proteasome component PRE6	5654.91	2551.09	1.59	1.19	0.67	0.17	0.1	0.11	0	0.99
PADG_03192	proteasome component PUP2	713.27	484.74	2.36	1.60	1.24	0.47	0.17	0.2	0	1
PADG_04067	proteasome component PUP3	1678.89	2748.64	1.64	1.14	0.71	0.13	0.15	0.18	0	0.91
PADG_03841	protein disulfide-isomerase domain	17109.33	19373.53	1.16	0.88	0.22	-0.13	0.05	0.04	0	0
PADG_08066	purine nucleoside phosphorylase I, inosine and guanosine-specific	ND	1433.7	ND	1.46	ND	0.38	ND	0.56	ND	0.92
PADG_05822	pyridoxine biosynthesis protein pyroA	1611.1	1195.91	1.27	1.22	0.34	0.2	0.09	0.12	0	1
PADG_04103	pyruvate carboxylase	796.22	ND	1.01	ND	0.01	ND	0.14	ND	0.43	ND
PADG_00714	pyruvate decarboxylase	852.98	2477.21	0.81	0.62	-0.3	-0.48	0.12	0.18	1	0
PADG_02063	pyruvate dehydrogenase	990.64	1111.04	1.12	0.91	0.16	-0.09	0.14	0.19	0.02	0.14
PADG_07213	pyruvate dehydrogenase complex dihydrolipoamide acetyltransferase	1810.32	6393.72	1.16	0.96	0.21	-0.04	0.07	0.09	0	0.2
PADG_01278	pyruvate kinase	1317.95	1513.53	1.43	0.96	0.52	-0.04	0.24	0.21	0	0.39
PADG_05025	ribosomal protein L24	ND	1716.08	ND	*	ND	*	ND	*	ND	*
PADG_02056	ribosomal protein L7/L12	9257.25	6872.26	1.77	1.93	0.82	0.66	0.15	0.17	0	1
PADG_08213	ribosomal protein S2	593.74	593.74	*	*	*	*	*	*	*	*
PADG_06768	rRNA 2'-O-methyltransferase fibrillarin	836.55	ND	*	ND	*	ND	*	ND	*	ND
PADG_08423	RuvB-like helicase 2	ND	443.26	ND	#	ND	#	ND	#	ND	#
PADG_03276	S-(hydroxymethyl)glutathione dehydrogenase	ND	1082.77	ND	*	ND	*	ND	*	ND	*
PADG_01718	saccharopine dehydrogenase [NADP+, L-glutamate-forming]	489.68	584.09	1.05	*	0.07	*	0.42	*	0.36	*
PADG_01928	S-adenosylmethionine synthase	1737.8	1171.14	1.47	1.07	0.56	0.07	0.11	0.15	0	0.82
PADG_05111	serine hydroxymethyltransferase, cytosolic	2403.18	1716.94	2.45	2.01	1.29	0.7	0.17	0.19	0	1
PADG_05897	serine-tRNA ligase	901.52	730.58	1.30	1.25	0.38	0.22	0.19	0.24	0	0.95
PADG_07422	serine proteinase	656.45	380.41	2.17	1.80	1.12	0.59	0.17	0.3	0	1
PADG_06856	small nuclear ribonucleoprotein Sm D2	1486.52	ND	1.13	ND	0.18	ND	0.41	ND	0.28	ND
PADG_04603	spermidine synthase	7353.23	1735.42	1.45	0.76	0.54	-0.28	0.15	0.22	0	0.03
PADG_00052	succinate dehydrogenase [ubiquinone] flavoprotein subunit, mitochondrial	2588.78	1339.48	1.82	1.62	0.86	0.48	0.09	0.07	0	1
PADG_08013	succinate dehydrogenase [ubiquinone] iron-sulfur subunit, mitochondrial	1131.51	768.68	1.31	2.48	0.39	0.91	0.34	0.37	0.02	1
PADG_07418	superoxide dismutase [Cu-Zn]	13608.78	2464.72	2.79	1.99	1.48	0.69	0.15	0.21	0	1
PADG_05504	thioredoxin	39625.11	13947.51	1.37	1.06	0.45	0.06	0.09	0.11	0	0.87
PADG_01551	thioredoxin reductase	1081.7	976.26	1.84	1.57	0.88	0.45	0.16	0.18	0	1
PADG_07420	transaldolase	1467.82	3551.69	*	0.72	*	-0.33	*	0.11	*	0
PADG_04604	transketolase	1424.25	2990.58	1.57	1.16	0.65	0.15	0.09	0.09	0	1
PADG_01949	translation elongation factor Tu	8904.08	3152.3	1.97	1.65	0.98	0.5	0.13	0.13	0	1
PADG_06110	translation initiation factor SUI1	2194.26	2158.53	1.34	1.06	0.42	0.06	0.32	0.33	0.01	0.61
PADG_06906	triosephosphate isomerase	4808	13656.52	0.79	0.85	-0.34	-0.16	0.13	0.1	1	0
PADG_00128	tubulin alpha-2 chain	1787.02	533.72	1.45	1.39	0.54	0.33	0.22	0.24	0	1
PADG_00995	ubiquitin-40S ribosomal protein S27a	1131.09	2933.72	1.75	2.34	0.81	0.85	0.14	0.14	0	1
PADG_07891	ubiquitin-60S ribosomal protein L40	1021.47	2561.7	1.26	2.59	0.33	0.95	0.26	0.12	0.01	1
PADG_01100	uracil phosphoribosyltransferase	1806.58	ND	*	ND	*	ND	*	ND	*	ND
PADG_07010	urease accessory protein UreG	ND	643.89	ND	#	ND	#	ND	#	ND	#
PADG_00331	uricase	654.57	1760.01	1.33	1.09	0.41	0.09	0.23	0.27	0	0.73
PADG_04032	uroporphyrinogen decarboxylase	562.49	ND	+	ND	+	ND	+	ND	+	ND
PADG_02683	UV excision repair protein Rad23	8139.56	1951.91	2.38	1.58	1.25	0.46	0.13	0.14	0	1
PADG_00634	vacuolar protease A	329.52	ND	+	ND	+	ND	+	ND	+	ND
PADG_08188	vacuolar-sorting protein snf7	1229.57	895.93	+	#	+	#	+	#	+	#
PADG_02484	valine-tRNA ligase	741.27	503.59	1.30	0.94	0.38	-0.06	0.19	0.23	0	0.29
PADG_04319	V-type ATPase, G subunit	1496.06	448.84	2.08	1.75	1.06	0.56	0.33	0.46	0	0.99
PADG_11981	V-type proton ATPase catalytic subunit A	452.37	430.31	1.82	2.36	0.86	0.86	0.27	0.33	0	1
PADG_03175	V-type proton ATPase subunit F	5509.99	877.44	2.89	1.88	1.53	0.63	0.72	0.71	0	0.95
ND: not detected in this condition
* Detected only in the control condition
(+)Detected only in fungal cells after incubation with non-primed macrophages
# Detected only in fungal cells after incubation with primed macrophages
